# Supplementary material for: Increased insulin resistance due to long COVID is associated with depressive symptoms and partly predicted by the inflammatory response during acute infection
Source: PubMed Central journal article supplement — Braz J Psychiatry. 2023 May 29;45(3):205–15. doi: 10.47626/1516-4446-2022-3002 (PMC10288478; doi:10.47626/1516-4446-2022-3002), 2023-05-29
Supplement: bjp-45-03-205-s001.pdf [file bjp-45-03-205-s001.pdf]

<http://doi.org/10.47626/1516-4446-2022-3002>

Increased insulin resistance due to long COVID is associated with depressive symptoms and partly predicted by the inflammatory response during acute infection - Al-Hakeim HK et al.

**Box S1** List of long COVID-19 symptoms

|                             |
|-----------------------------|
| Fatigue                     |
| Cognitive dysfunctions      |
| Abdominal pain              |
| Menstrual problems          |
| Altered smell/taste         |
| Anxiety                     |
| Blurred vision              |
| Chest pain                  |
| Cough                       |
| Shortness of breath         |
| Depression                  |
| Insomnia                    |
| Dizziness                   |
| Intermittent fever          |
| Gastrointestinal issues     |
| Headache                    |
| Joint pain                  |
| Muscle pain/spasms          |
| Neuralgias                  |
| New onset allergies         |
| Pins and needles sensations |
| Post-exertional malaise     |
| Tachycardia/palpitations    |
